# Supplementary material
Source: publisher figshare collection journal article supplement (https://acs.figshare.com/ndownloader/files/4189324)
Supplement: Supplementary file 1 [file 4189324]

**Figure S1**

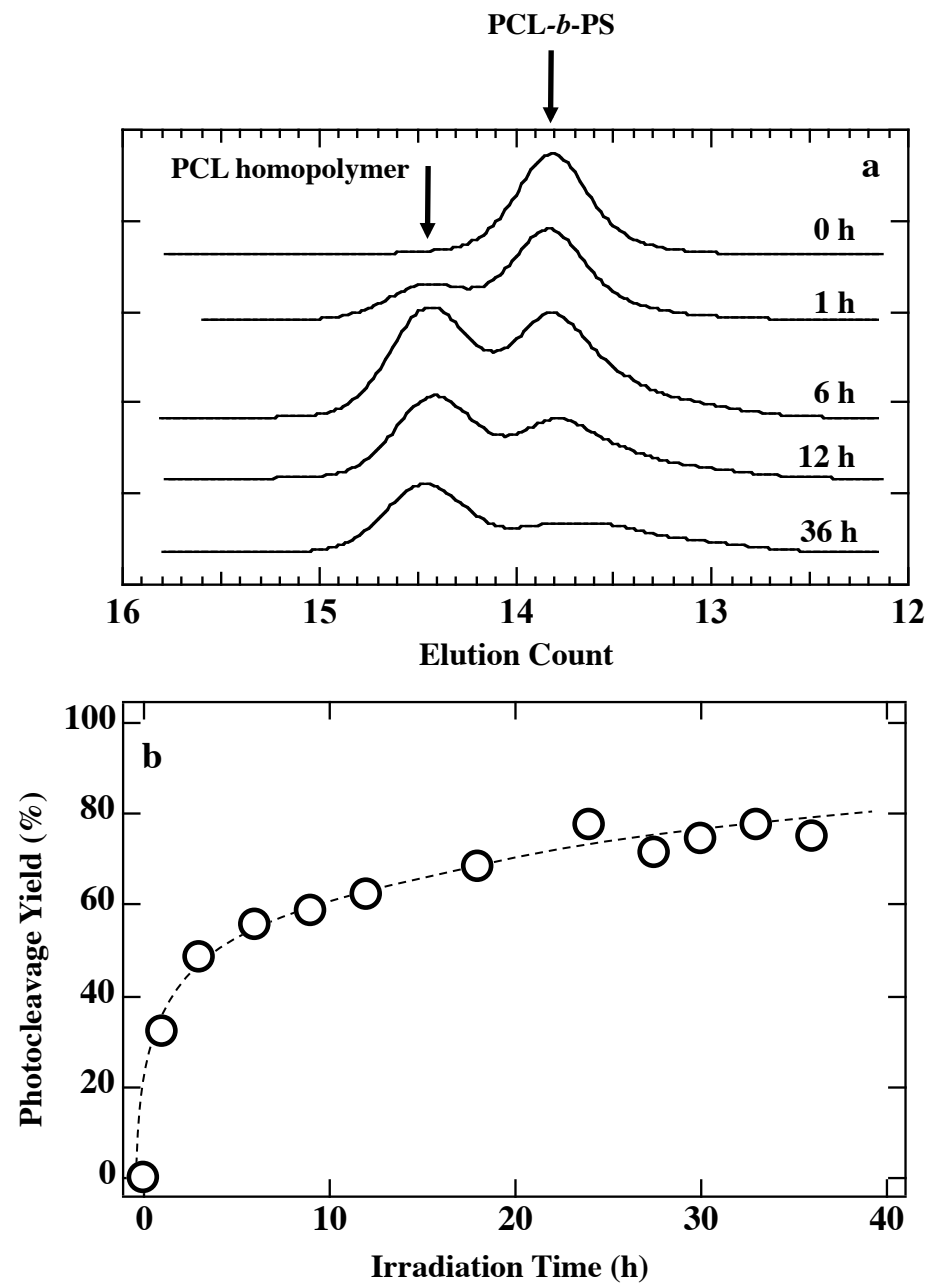

**Figure S1.** (a) GPC chart of PCL-*b*-PS copolymers with UV irradiation during various times indicated. (b) Photocleavage yield plotted against irradiation time of UV light.

**Figure S2**

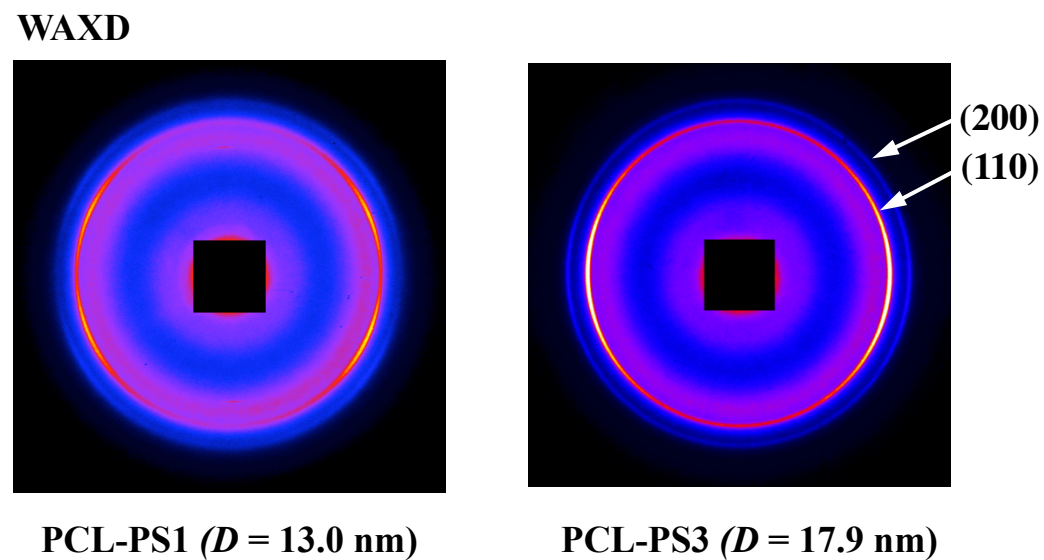

**Figure S2.** 2D-WAXD patterns viewed from X direction for PCL-PS1 ( $D = 13.0$  nm) and PCL-PS3 ( $D = 17.9$  nm) both crystallized at  $-40$  °C. The X direction is perpendicular to the shear direction.

**Figure S3**

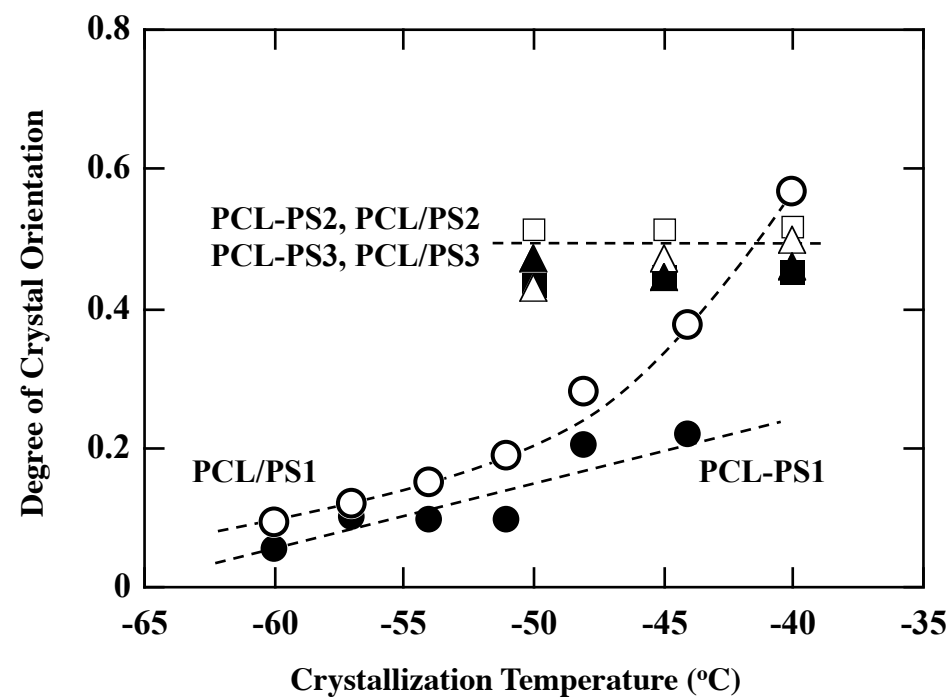

**Figure S3.** Degree of crystal orientation plotted against crystallization temperature for all the samples investigated.
